# Supplementary material for: Nutrient release and flux dynamics of CO 2 , CH 4 and N 2 O in a coastal peatland driven by actively induced rewetting with brackish water from the Baltic Sea
Source: Copernicus journal article supplement (doi:10.5194/bg-2022-117), 2022-05-24
Supplement: Supplementary file [file bg-2022-117-AC2-supplement.pdf]

Figure D1: Cross plot correlations of the measured nutrient concentrations for the peatland and the inner bay.

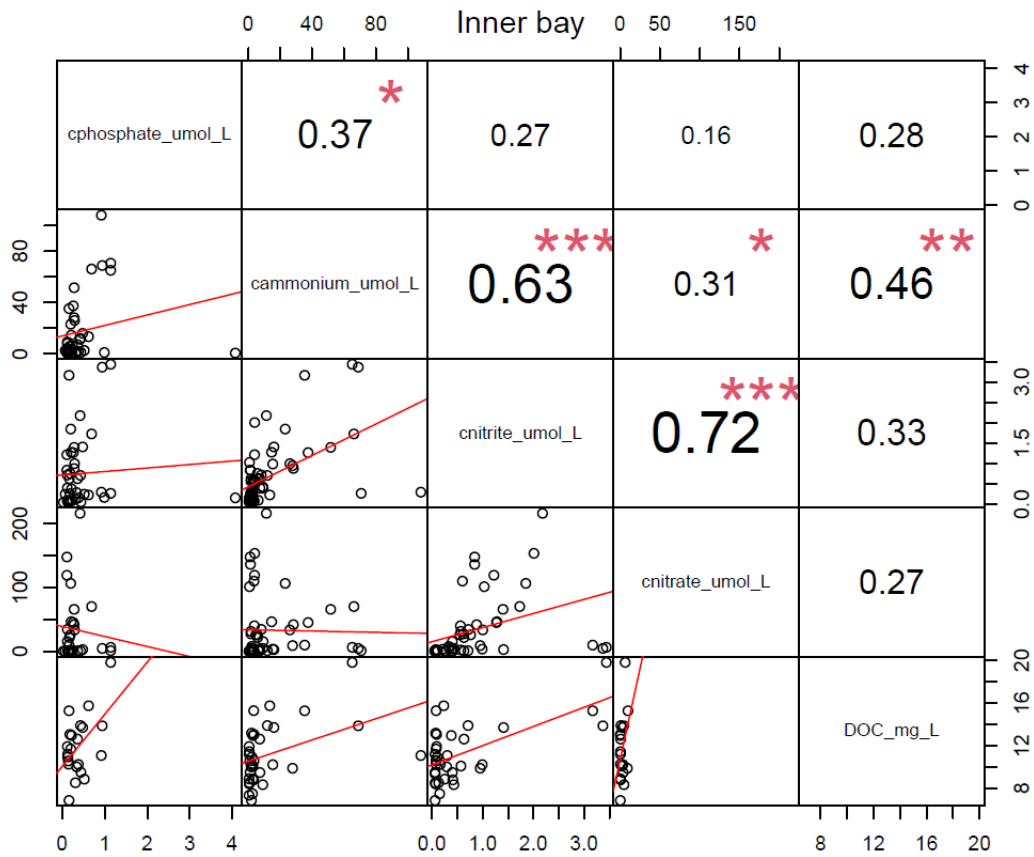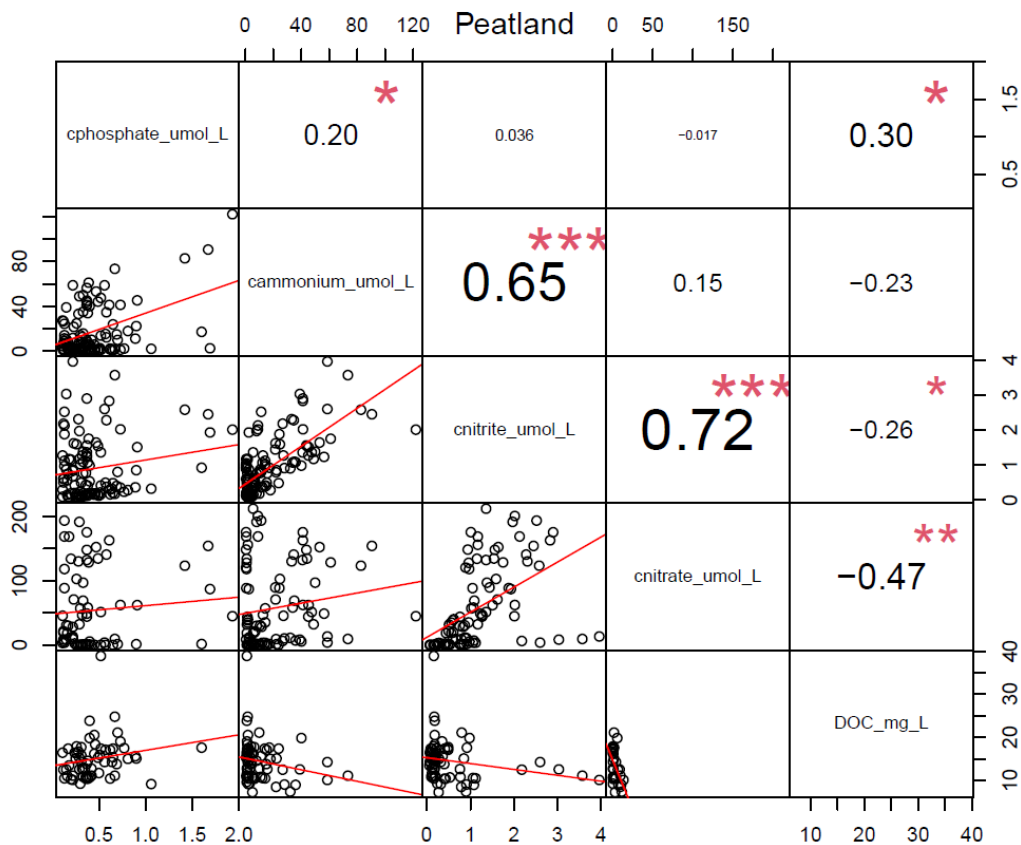

Table for the Supplement: Calculated GHG fluxes after rewetting by considering three different measurement methods: (1) chamber at transect, (2) k model at transect, and (3) k model within the area.

|                                                          |              | Pre-rewetting flux  |               | Post-rewetting flux |               |
|----------------------------------------------------------|--------------|---------------------|---------------|---------------------|---------------|
|                                                          | location     | method              | GHG flux      | method              | GHG flux      |
| CO <sub>2</sub><br>(g m <sup>-2</sup> h <sup>-1</sup> )  | formerly dry | chamber - transect: | 0.29 ± 0.82   | chamber - transect: | 0.20 ± 0.26   |
|                                                          |              |                     |               | k model - transect  | 0.47 ± 0.36   |
|                                                          |              |                     |               | k model - area:     | 0.28 ± 0.26   |
|                                                          | ditch        | chamber - transect: | 0.28 ± 0.13   | chamber - transect: | 0.26 ± 0.23   |
|                                                          |              |                     |               | k model - transect: | 0.48 ± 0.34   |
|                                                          |              |                     |               |                     |               |
| CH <sub>4</sub><br>(mg m <sup>-2</sup> h <sup>-1</sup> ) | formerly dry | chamber - transect: | 0.13 ± 1.01   | chamber - transect: | 2.33 ± 9.70   |
|                                                          |              |                     |               | k model - transect: | 0.65 ± 0.40   |
|                                                          |              |                     |               | k model - area:     | 1.00 ± 0.70   |
|                                                          | ditch        | chamber - transect: | 11.37 ± 37.54 | chamber - transect: | 11.33 ± 30.87 |
|                                                          |              |                     |               | k model - transect: | 0.64 ± 0.33   |
|                                                          |              |                     |               |                     |               |
